# Supplementary material for: MicroRNA in exosomes isolated directly from the liver circulation in patients with metastatic uveal melanoma
Source: BMC Cancer. 2014 Dec 16;14:962. doi: 10.1186/1471-2407-14-962 (PMC4320618; doi:10.1186/1471-2407-14-962)
Supplement: Supplementary file 1 — Additional file 1: Table S1: MiRNA profile of purified liver perfusion exosomes (n=5), from patients with uveal melanoma, and five cell lines used as controls, were analysed for the presence of a panel of 88 cancer-related miRNA using RT2 miRNA PCR. The table shows all miRNA that passed quality control; Samples with a Ct value over 35, and samples showing more than one melt peak, with a ratio less than 80% between the major peak and the secondary peak, were excluded from the analysis. As no reference genes are available, miRNA were ranked according to their Ct values for each sample. (PDF 95 KB) [file 12885_2014_5177_MOESM1_ESM.pdf]

**Supplementary Table 1.** MiRNA profile of purified liver perfusion exosomes (n=5), from patients with uveal melanoma, and five cell lines used as controls, were analysed for the presence of a panel of 88 cancer-related miRNA using RT2 miRNA PCR. The table shows all miRNA that passed quality control; Samples with a Ct value over 35, and samples showing more than one melt peak, with a ratio less than 80% between the major peak and the secondary peak, were excluded from the analysis. As no reference genes are available, miRNA were ranked according to their Ct values for each sample.

| Patient 1       | Patient 5       | Patient 7       | Patient 8       | Patient 9       | A375            | MML-1           | HTB-133         | HTB-177         | HMC-1           |
|-----------------|-----------------|-----------------|-----------------|-----------------|-----------------|-----------------|-----------------|-----------------|-----------------|
| hsa-miR-9*      | hsa-miR-125a-5p | hsa-miR-9*      | hsa-miR-9*      | hsa-miR-9*      | hsa-miR-9*      | hsa-miR-9*      | hsa-miR-16      | hsa-miR-21      | hsa-miR-10b     |
| hsa-miR-125a-5p | hsa-miR-9*      | hsa-miR-125a-5p | hsa-miR-125a-5p | hsa-miR-129-5p  | hsa-miR-125a-5p | hsa-miR-125a-5p | hsa-miR-21      | hsa-miR-16      | hsa-miR-16      |
| hsa-miR-181b    | hsa-miR-216a    | hsa-miR-216a    | hsa-miR-125b    | hsa-miR-107     | hsa-miR-181b    | hsa-miR-216a    | hsa-miR-9*      | hsa-miR-25      | hsa-miR-9*      |
| hsa-miR-25      | hsa-miR-125b    | hsa-miR-125b    | hsa-miR-216a    | hsa-miR-125b    | hsa-miR-23a     | hsa-miR-15b     | hsa-miR-181b    | hsa-miR-181b    | hsa-miR-21      |
| hsa-miR-216a    | hsa-miR-9       | hsa-miR-25      | hsa-miR-107     | hsa-miR-125a-5p | hsa-miR-10b     | hsa-miR-25      | hsa-miR-181b    | hsa-miR-149     | hsa-miR-146b-5p |
| hsa-miR-320a    | hsa-miR-217     | hsa-miR-129-5p  | hsa-miR-9       | hsa-miR-370     | hsa-miR-125b    | hsa-miR-125b    | hsa-miR-10b     | hsa-miR-125b    | hsa-miR-25      |
| hsa-miR-217     | hsa-miR-320a    | hsa-miR-320a    | hsa-miR-25      | hsa-miR-25      | hsa-miR-320a    | hsa-miR-217     | hsa-miR-191     | hsa-miR-15b     | hsa-miR-125a-5p |
| hsa-miR-335     | hsa-miR-107     | hsa-miR-107     | hsa-miR-217     | hsa-miR-216a    | hsa-miR-21      | hsa-miR-335     | hsa-miR-216a    | hsa-miR-24      | hsa-miR-23a     |
| hsa-miR-125b    | hsa-miR-129-5p  | hsa-miR-217     | hsa-miR-19a     | hsa-miR-210     | hsa-miR-216a    | hsa-miR-19a     | hsa-miR-25      | hsa-miR-23a     | hsa-miR-19a     |
| hsa-miR-370     | hsa-miR-335     | hsa-miR-335     | hsa-miR-129-5p  | hsa-miR-217     | hsa-miR-23a     | hsa-miR-133a    | hsa-miR-23a     | hsa-miR-27a     | hsa-miR-335     |
| hsa-miR-19a     | hsa-miR-370     | hsa-miR-9       | hsa-miR-320a    | hsa-miR-335     | hsa-miR-25      | hsa-miR-129-5p  | hsa-miR-24      | hsa-miR-191     | hsa-miR-148a    |
| hsa-miR-133a    | hsa-miR-19a     | hsa-miR-19a     | hsa-miR-335     |                 | hsa-miR-217     | hsa-miR-21      | hsa-miR-148a    | hsa-miR-17      | hsa-miR-20a     |
| hsa-miR-107     | hsa-miR-19b     | hsa-miR-181b    | hsa-miR-370     |                 | hsa-miR-146a    | hsa-miR-10b     | hsa-miR-125a-5p | hsa-miR-93      | hsa-miR-125b    |
| hsa-miR-222*    | hsa-miR-181b    | hsa-miR-370     | hsa-miR-210     |                 | hsa-miR-191     | hsa-miR-203     | hsa-miR-425     | hsa-miR-125a-5p | hsa-miR-101     |
| hsa-miR-486-5p  | hsa-miR-505     | hsa-miR-133a    | hsa-miR-323-5p  |                 | hsa-miR-133a    | hsa-miR-26a     | hsa-miR-203     | hsa-miR-106a    | hsa-miR-182     |
| hsa-miR-425     | hsa-miR-25      | hsa-miR-19b     | hsa-miR-19b     |                 | hsa-miR-335     | hsa-miR-9       | hsa-miR-19b     | hsa-miR-9*      | hsa-miR-9       |
| hsa-miR-17      | hsa-miR-26a     | hsa-miR-210     | hsa-miR-181b    |                 | hsa-miR-486-5p  | hsa-miR-183     | hsa-miR-26a     | hsa-miR-216a    |                 |
| hsa-miR-19b     | hsa-miR-210     | hsa-miR-486-5p  | hsa-miR-222*    |                 | hsa-miR-149     |                 | hsa-miR-23b     | hsa-miR-20a     |                 |
| hsa-miR-323-5p  | hsa-miR-124     | hsa-miR-150     |                 |                 | hsa-miR-27a     |                 | hsa-miR-30b     | hsa-miR-19a     |                 |
| hsa-miR-200a    | hsa-miR-182     | hsa-miR-222*    |                 |                 | hsa-miR-222*    |                 | hsa-miR-19a     | hsa-miR-19b     |                 |
| hsa-miR-324-5p  | hsa-miR-323-5p  | hsa-miR-200a    |                 |                 | hsa-miR-323-5p  |                 | hsa-miR-30c     | hsa-miR-23b     |                 |
| hsa-miR-149     | hsa-miR-127-5p  | hsa-miR-16      |                 |                 | hsa-miR-19a     |                 | hsa-miR-217     | hsa-miR-30c     |                 |
| hsa-miR-133b    | hsa-miR-200a    | hsa-miR-323-5p  |                 |                 | hsa-miR-9       |                 | hsa-miR-20a     | hsa-miR-30b     |                 |
| hsa-miR-182     | hsa-miR-149     |                 |                 |                 | hsa-miR-324-5p  |                 | hsa-miR-27a     | hsa-miR-451     |                 |
| hsa-miR-210     | hsa-miR-324-5p  |                 |                 |                 | hsa-miR-221     |                 | hsa-miR-129-5p  | hsa-miR-486-5p  |                 |
| hsa-miR-130b    | hsa-miR-222*    |                 |                 |                 | hsa-miR-107     |                 | hsa-miR-222*    | hsa-miR-10b     |                 |
| hsa-miR-124     | hsa-miR-146b-5p |                 |                 |                 | hsa-miR-19b     |                 | hsa-miR-125b    | hsa-miR-150     |                 |
| hsa-miR-505     | hsa-miR-21      |                 |                 |                 | hsa-miR-200a    |                 | hsa-miR-335     | hsa-miR-148a    |                 |
| hsa-miR-296-5p  |                 |                 |                 |                 | hsa-miR-124     |                 | hsa-miR-150     | hsa-miR-425     |                 |
| hsa-miR-101     |                 |                 |                 |                 | hsa-miR-23b     |                 | hsa-miR-182     | hsa-miR-106b    |                 |
| hsa-miR-191     |                 |                 |                 |                 | hsa-miR-296-5p  |                 | hsa-miR-101     | hsa-miR-222*    |                 |
| hsa-miR-30c     |                 |                 |                 |                 | hsa-miR-30c     |                 | hsa-miR-200a    | hsa-miR-29a     |                 |
| hsa-miR-15a     |                 |                 |                 |                 | hsa-miR-129-5p  |                 | hsa-miR-451     | hsa-let-7b      |                 |
